# Genomic Characterization of Group C Orthobunyavirus Reference Strains and Recent South American Clinical Isolates

Jun Hang<sup>1\*</sup>, Brett M. Forshey<sup>2,3</sup>, Yu Yang<sup>1</sup>, Víctor Fiestas Solórzano<sup>3</sup>, Robert A. Kuschner<sup>1</sup>, Eric S. Halsey<sup>2</sup>, Richard G. Jarman<sup>1</sup>, Tadeusz J. Kochel<sup>4</sup>

**1** Viral Diseases Branch, Walter Reed Army Institute of Research, Silver Spring, Maryland, United States of America, **2** U.S. Naval Medical Research Unit No. 6, Iquitos and Lima, Peru, **3** Centro Nacional de Salud Pública, Instituto Nacional de Salud, Lima, Peru, **4** U.S. Naval Medical Research Center, Silver Spring, Maryland, United States of America

## Abstract

Group C orthobunyaviruses (family *Bunyaviridae*, genus *Orthobunyavirus*), discovered in the 1950s, are vector-borne human pathogens in the Americas. Currently there is a gap in genomic information for group C viruses. In this study, we obtained complete coding region sequences of reference strains of Caraparu (CARV), Oriboca (ORIV), Marituba (MTBV) and Madrid (MADV) viruses, and five clinical isolates from Peru and Bolivia, using an unbiased *de novo* approach consisting of random reverse transcription, random anchored PCR amplification, and high throughput pyrosequencing. The small, medium, and large segments encode for a 235 amino acid nucleocapsid protein, an approximately 1430 amino acid surface glycoprotein polyprotein precursor, and a 2248 amino acid RNA-dependent RNA polymerase, respectively. Additionally, the S segment encodes for an 83 amino acid non-structural protein, although this protein is truncated or silenced in some isolates. Phylogenetically, three clinical isolates clustered with CARV, one clustered with MTBV, and one isolate appeared to be a reassortant or a genetic drift resulted from the high variability of the medium segment which was also seen in a few other orthobunyaviruses. These data represent the first complete coding region sequences for this serocomplex of pathogenic orthobunyaviruses. The genome-wide phylogeny of reference strains is consistent with the antigenic properties of the viruses reported in the original serological studies conducted in the 1960s. Comparative analysis of conserved protein regions across group C virus strains and the other orthobunyavirus groups revealed that these group C viruses contain characteristic domains of potential structural and functional significance. Our results provide the basis for the developments of diagnostics, further genetic analyses, and future epidemiologic studies of group C viruses.

**Citation:** Hang J, Forshey BM, Yang Y, Solórzano VF, Kuschner RA, et al. (2014) Genomic Characterization of Group C Orthobunyavirus Reference Strains and Recent South American Clinical Isolates. PLoS ONE 9(3): e92114. doi:10.1371/journal.pone.0092114

**Editor:** Tetsuro Ikegami, The University of Texas Medical Branch, United States of America

**Received:** December 3, 2013; **Accepted:** February 17, 2014; **Published:** March 14, 2014

This is an open-access article, free of all copyright, and may be freely reproduced, distributed, transmitted, modified, built upon, or otherwise used by anyone for any lawful purpose. The work is made available under the Creative Commons CC0 public domain dedication.

**Funding:** This work was supported by the Global Emerging Infections Surveillance and Response System, a Division of the Armed Forces Health Surveillance Center. The funders had no role in study design, data collection and analysis, decision to publish, or preparation of the manuscript.

**Competing Interests:** The authors have declared that no competing interests exist.

\* E-mail: jun.hang.ctr@mail.mil

These authors contributed equally to this work.

## Introduction

The genus *Orthobunyavirus* (family *Bunyaviridae*) encompasses great genetic and antigenic diversity, with approximately 50 classified viral species belonging to a variety of serogroups, including Bunyamwera, California, group C, and Simbu [1]. Orthobunyaviruses are enveloped viruses that contain a tri-segmented negative-sense RNA genome, which encodes a large RNA-dependent RNA polymerase (L protein or RdRP) on the large (L) segment, a polyprotein precursor that comprises two envelope glycoproteins (Gc and Gn) and a non-structural protein (NSm) on the medium (M) segment, and a nucleocapsid protein (NP or N protein) and a non-structural protein (NSs) on the small (S) segment [2,3]. Most orthobunyaviruses are transmitted by arthropods, and many are associated with human diseases, including several reported emerging infectious diseases [4,5].

Group C viruses were named based on their serological characteristics distinctive from the historical group A (alphaviruses

of the family *Togaviridae*) and group B (flaviviruses of the family *Flaviviridae*) arboviruses [6]. Since the first identification of group C viruses in Brazil in the 1950s, including Marituba virus (MTBV, strain BeAn15) and Oriboca virus (ORIV, strain BeAn17), a number of group C viruses have been isolated from humans, monkeys, other animals, and arthropods in all major tropical and subtropical regions in the Americas [7–11]. In humans, group C virus infections can produce fever with symptoms that are difficult to distinguish from dengue viral infection [12]. Virus classification is traditionally based on systematic serological assays, which are limited by the availability of specific and high quality antisera. Four major serological complexes within group C were established based on isolates collected during the 1950s and 1960s, which are represented by the species *Caraparu virus* (CARV), *Madrid virus* (MADV), *Marituba virus* (MTBV), and *Oriboca virus* (ORIV) in the International Committee on Taxonomy of Viruses (ICTV) database [1]. Despite their association with human illness, there is a paucity of genetic data for group C viruses. For example, there

are no whole genome sequences or complete coding region sequences of all three segments for any group C virus publically available in GenBank database. The molecular studies that have been conducted were based on S segment sequences and/or partial sequences of L and M segments [9,13,14], and are therefore insufficient for accurate phylogenetic characterization.

To address the scarcity of genome sequences of group C viruses, the four reference strains which are listed by the ICTV (<http://ictvonline.org/>) to represent the four established serological complexes within the group C were subjected to whole genome sequencing using unbiased random amplification and next-generation sequencing. In addition, five group C virus isolates collected from participants in an acute febrile illness surveillance study in Peru and Bolivia between 2003 and 2008 [11] were sequenced. Phylogenetic relatedness among the references, the recent clinical isolates, and more distantly related orthobunyaviruses was established and comparative analysis of complete coding region sequences was conducted.

## Materials and Methods

### Viruses, viral culture, RNA purification

Group C virus reference strains (Table 1) were obtained from the American Type Culture Collection (ATCC). Clinical specimens (Table 1) were isolated from acute-phase sera of patients identified through a clinic-based febrile surveillance program run jointly by the US Naval Medical Research Unit No. 6 and the Peruvian Ministry of Health [11]. The clinical specimens used in this study were obtained under the terms of a human use protocol (NMRCD.2000.0006). Written, informed consent was obtained from the participants or from a parent or legal guardian. The human use protocol and the consent procedure were approved by the Naval Medical Research Center Institutional Review Board (Bethesda, MD, USA) in compliance with all U.S. federal regulations governing the protection of human subjects. Clinical isolates were provisionally classified as group C viruses based on reactivity with CARV and Murutucu virus (MURV, a member of the MTBV serocomplex) antibodies in an immunofluorescence assay, as previously described by Forshey et al [11].

All virus strains were propagated in Vero (African green monkey kidney) cells and harvested upon appearance of cytopathic effect (CPE). Viral culture supernatants were clarified by centrifugation and precipitated by the addition of 1.4 g

polyethylene glycol (PEG) 8000 and 0.47 g NaCl to each 10 ml of clear supernatant and refrigerated overnight. After centrifugation at 3200×g for 30 min at 4°C, the pellets were resuspended with 0.5 ml of PBS containing magnesium and calcium and 0.5 µl of Benzonase nuclease (12.5 U/µl) (Sartorius Stedim, Germany) and incubated at 37°C for 30 min. After treatment, RNA was extracted using Trizol LS (Invitrogen).

### Random reverse transcription and amplification, high throughput pyrosequencing

RNA extracts were reverse transcribed and amplified using anchored random octamer oligos. Random amplicons were ligated to Roche GS RL adaptors and size selected to recover libraries of 250 bp or larger DNA molecules. Roche GS FLX Titanium or FLX+ system was used to sequence the libraries using the manufacturer recommended protocols with modifications. The procedure development and its application to *de novo* sequencing of a novel viral sequence was described in detail previously [15].

### Pyrosequencing data analysis, genome sequence assembly and analysis

Roche GS data analysis software GS De Novo Assembler version 2.5.3 was used in *de novo* assembly of the pyrosequencing data. GS Reference Mapper version 2.5.3 was used for reference mapping sequence assembly. Other bioinformatics tools and the applications in the study included MEGA 5.2.1 for phylogenetic analysis [16], Geneious Pro version 5.6.4 (Biomatters Ltd, Auckland, New Zealand) for visualization of sequence assembly results, sequence editing, alignment and phylogenetic analysis, NCBI discontinuous Megablast (<http://blast.ncbi.nlm.nih.gov/Blast.cgi>) [17] for alignment of sequences with low identity, NCBI ORF Finder (<http://www.ncbi.nlm.nih.gov/gorf/orf.cgi>) for finding open reading frames and identification of conserved regions by searching against the protein sequence database, and Sequin software for the annotation and compiling of GenBank format files. Prior to phylogenetic analyses, nucleotide or amino acid sequences were aligned using program MUSCLE [18], edited to trim sequences from both termini that could not be reliably aligned, then realigned. Phylogenetic distance trees were subsequently constructed by using the Neighbor-Joining (NJ) method and the Tamura-Nei model with the use of the Maximum Composite Likelihood model to verify the analytical results.

**Table 1.** Group C virus reference strains and recent South American isolates used in the study.

| Virus Identity           | Source institution, Catalog number | Year | Isolation location     | Tissue origin                   | GenBank Accession Numbers for sequences from this study |
|--------------------------|------------------------------------|------|------------------------|---------------------------------|---------------------------------------------------------|
| Marituba (MTBV) BeAn15   | ATCC, VR-308                       | 1954 | Belem, Brazil          | <i>Cebus apella</i> serum       | KF254770 - KF254772                                     |
| Oriboca (ORIV) BeAn17    | ATCC, VR-310                       | 1954 | Belem, Brazil          | <i>Cebus apella</i> serum       | KF254773 - KF254775                                     |
| Caraparu (CARV) BeAn3994 | ATCC, VR-307                       | 1956 | Belem, Brazil          | <i>Cebus apella</i> serum       | KF254776 - KF254778                                     |
| Madrid (MADV) BT 4075    | ATCC, VR-385                       | 1961 | Bocas del Toro, Panama | Serum from a 36-year-old male   | KF254779 - KF254781                                     |
| IQE7620                  | NAMRU6                             | 2008 | Iquitos, Peru          | Serum from a 14-year-old female | JN157805 KF254782<br>KF254783                           |
| FVB0426                  | NAMRU6                             | 2008 | Cochabamba, Bolivia    | Serum from a 24-year-old female | KF254784 - KF254786                                     |
| IQD5973                  | NAMRU6                             | 2003 | Iquitos, Peru          | Serum from a 17-year-old female | KF254787 - KF254789                                     |
| FSL2923                  | NAMRU6                             | 2006 | Yurimaguas, Peru       | Serum from a 59-year-old male   | KF254790 - KF254792                                     |
| FMD0783                  | NAMRU6                             | 2006 | Puerto Maldonado, Peru | Serum from a 21-year-old male   | KF254793 - KF254795                                     |

ATCC, the American Type Culture Collection.  
doi:10.1371/journal.pone.0092114.t001

Deduced protein sequences were submitted to PROMALS web server (<http://prodata.swmed.edu/promals/>) for multiple protein sequence alignments, secondary structure prediction and determination of conservation indices for the amino acid residues using AL2CO program [19,20].

## Results

### Genome segments and encoded proteins

We sequenced the four group C virus reference strains and five recent isolates (Table 1) by using an unbiased approach. High sequence coverage depth (67-fold or greater in average sequence alignment coverage) was obtained for each virus (Table 2). Sequences for genome segments obtained using random amplification and pyrosequencing comprise complete coding sequences and partial terminal untranslated sequences. The deduced amino acid sequences from the nucleotide sequences acquired in this study have similar amino acid lengths with other orthobunyavirus complete coding regions (Table 2), except for the Brazoran virus which has a 1.7 kb S segment encoding putative 172 amino acid NSs and 442 amino acid N protein [21]. The amino acid similarities are consistent with the established taxonomic relationships [1]; specifically, group C virus isolates shared less than 55%, 35%, and 45% pairwise amino acid identity with members of other orthobunyavirus serogroups for the L, M, and S segments, respectively (Supplementary Table S1, white areas). Pairwise amino acid identities within the group C, based on sequences from this study, ranged from 79.4% to 99.4% for the L segment, 65.2% to 98.7% for the M segment, and 71.5% to 98.3% for the S segment (Table S1, shaded areas). All segments of recent clinical isolates showed high sequence identity to segments of one or more of the reference viruses, with the exception of the M segment of isolate FSL2923 (Table S1). FVB0426, FMD0783, and IQD5973 showed greater than 96% pairwise amino acid identities with CARV for all three segments. IQE7620 segment sequences were most similar to MTBV, with the amino acid identities of 92.8%, 90.5% and 97.5% for L, M and S respectively. L and S segments for FSL2923 were highly similar with CARV, while its M segment was almost equally divergent from CARV and MADV, with nucleotide (amino acid) identities of 75.3% (83.2%) and 76.0% (84.8%), respectively (Table S1).

### Phylogenetic relationship based on whole genome sequences

To determine the evolutionary relationships among orthobunyaviruses of other serogroups, phylogenetic trees based on complete coding sequences were constructed for the L, M and S segments (Figure 1). Sequences for all group C viruses clustered together in a clade distinctive from other orthobunyavirus groups. For all three trees, MADV and CARV were on neighboring branches, distinct from MTBV and ORIV. Overall, MTBV and ORIV had a close phylogenetic relationship, in particular for their S and L segments. M segment for MTBV was slightly closer to MADV/CARV than to ORIV. FVB0426, FMD0783, and IQD5973 were all closely related to CARV, while IQE7620 was more related to MTBV. For FSL2923, the L and S genome segments were both phylogenetically more closely related to CARV, but the M segment was more closely related to MADV.

### Protein sequence conservation analysis and identification of variable regions

Conserved protein regions across group C virus strains and the other orthobunyavirus groups were explored to show whether these group C viruses contain characteristic domains of potential

structural and functional significance (Figure 2). Overall, on genus level, the L protein is highly conserved, although amino acid sequences at both termini are slightly less conserved than the central region. The predicted group C virus L protein RdRP has a strict length of 2248 amino acids (Table 2). The putative RdRP catalytic domain is located within amino acid residues 597–1330 (group C virus numbering) [22]. The region contains multiple extremely conserved motifs including the designated pre-motif A, motif A-E, and all 16 residues strictly conserved across the family *Bunyaviridae* as well as in some other negative-stranded RNA viruses [23]. The previously identified N-terminal conserved region 1 (15 to 143) and region 2 (634 to 779), the intermediate variable linker region, all key region 1 residues (R36, H37, F40, P81, D82, D95 and K97), and key region 2 residues (R657 and Y658) [23] were also found in all group C virus L proteins. The predicted consensus secondary structure for the N-terminus of group C virus L proteins has an arrangement of  $\alpha$ 1- $\beta$ 1 $\beta$ 2 $\alpha$ 4 $\beta$ 3- $\beta$ 4 $\alpha$ 5 $\beta$ 5 $\alpha$ 6 $\alpha$ 7, which is nearly identical to that from the crystal structure for LC183, N-terminal 183 amino acid fragment of *La Crosse virus* (LACV; genus *Orthobunyavirus*) [24], except that a short motif, IVVDIN / ITLNVT for LACV / CARV was predicted to form  $\beta$ 5 but not revealed in the LC183 crystal structure. Based on the high structural similarity, L protein N-terminal domain of group C viruses likely also has endonuclease activity similar to PA polymerase N-terminal domain of influenza [24].

We compared group C virus amino acid residues in the N protein with residues previously reported to be conserved across other orthobunyavirus serogroups. Over sixty key functional residues were proposed to be crucial for the hydrophobic core structure, the RNA binding sites and NP-NP oligomerization interface, based on mutational analysis and determined crystal structures of orthobunyavirus NPs [25,26]. These residues were considered absolutely genus-conserved and, as expected, almost all of them were found identical (46/63) or chemically similar (11/63) in group C virus NP sequences. Notably, polymorphic sites were found at the following positions (6/63) in some group C viruses: P84 to S/T, H93Y, E150 to I/V, T155 to D/E, P160S, and A191P (LACV numbering, Table 3). Additional amino acid sites in NP previously reported to be absolutely conserved across the orthobunyavirus genus [25,27], but varied in our group C viruses include F158M, V168A, and M173I. Many of these residues are located in regions outside the core structural and functional domains. This polymorphic variance also presents in other recent orthobunyavirus sequences with variation rates lower than in group C viruses (Table 3).

The predicted NSs protein for most group C viruses is 83 amino acids in sequence length, shorter than most other orthobunyaviruses NSs proteins, which generally include 91–101 amino acids. Pairwise amino acid identity between species ranges from 96.8% (MADV vs CARV) to 45.2% (CARV vs ORIV) within group C and as low as 22.6% (CARV/MADV vs Bunyawera) when compared with other orthobunyaviruses [2]. The start codon ATG (AUG) is mutated to TTG (UUG) in the homologous NSs coding regions for MTBV BeAn15, ORIV BeAn17, and isolate IQE7620. Since TTG is rarely used in eukaryotes to initiate translation [28], the NSs protein translations for these isolates might be fully silenced or truncated by 21 amino acids if translation is initiated at next in-frame ATG. The absence or truncation of NSs ORF was shown or speculated in other orthobunyaviruses [29,30]. The actual alteration of NSs translation and the functional consequences are yet to be elucidated.

Consistent with other orthobunyaviruses, the M segment of group C viruses encodes a protein of approximately 1430 amino acids (Table 2). Proteins encoded on M segments (Gn, NSm, and

**Table 2.** Group C virus genome sequences and deduced amino acid sequences.

| Virus                          | Average Sequencing Depth | L segment  |           |             | M segment      |            |         | S segment |  |  |
|--------------------------------|--------------------------|------------|-----------|-------------|----------------|------------|---------|-----------|--|--|
|                                |                          | Genome(nt) | RdRP (aa) | Genome (nt) | Gn/NSm/Gc (aa) | Genome(nt) | NP (aa) | NSs (aa)  |  |  |
| Bunyawera virus (NC_001925-7)  | NA                       | 6875       | 2238      | 4458        | 1433           | 961        | 233     | 101       |  |  |
| La Crosse virus (NC_004108-10) | NA                       | 6980       | 2263      | 4527        | 1441           | 984        | 235     | 92        |  |  |
| Simbu virus (NC_018476-8)      | NA                       | 6895       | 2253      | 4417        | 1409           | 860        | 233     | 91        |  |  |
| Oropouche virus (NC_005775-7)  | NA                       | 6846       | 2250      | 4385        | 1420           | 754        | 231     | 91        |  |  |
| Marituba (MTBV) BeAn15         | 273                      | 6894       | 2248      | 4594        | 1435           | 1111       | 235     | 62*       |  |  |
| Oriboca (ORIV) BeAn17          | 2165                     | 6895       | 2248      | 4332        | 1429           | 1032       | 235     | 62*       |  |  |
| Caraparu (CARV) BeAn3994       | 396                      | 6855       | 2248      | 4356        | 1430           | 1048       | 235     | 83        |  |  |
| Madrid (MADV) BT4075           | 825                      | 6872       | 2248      | 4642        | 1429           | 1090       | 235     | 83        |  |  |
| IQE7620                        | 210                      | 6936       | 2248      | 4538        | 1431           | 1008       | 235     | 62*       |  |  |
| FVB0426                        | 127                      | 6850       | 2248      | 4352        | 1430           | 1049       | 235     | 83        |  |  |
| IQD5973                        | 67                       | 6794       | 2248      | 4392        | 1430           | 1039       | 235     | 83        |  |  |
| FSL2923                        | 161                      | 6854       | 2248      | 4371        | 1429           | 966        | 235     | 83        |  |  |
| FMD0783                        | 465                      | 6849       | 2248      | 4349        | 1430           | 1028       | 235     | 83        |  |  |

Sequences for genome segments obtained in this study include complete coding sequences and partial terminal untranslated sequences, except IQE7620 L segment sequence is complete. Four representative orthobunyaviruses of other serogroups are shown for comparison. \* Three NSs open reading frames are predicted to be N-terminus truncated which may not express.  
doi:10.1371/journal.pone.0092114.t002

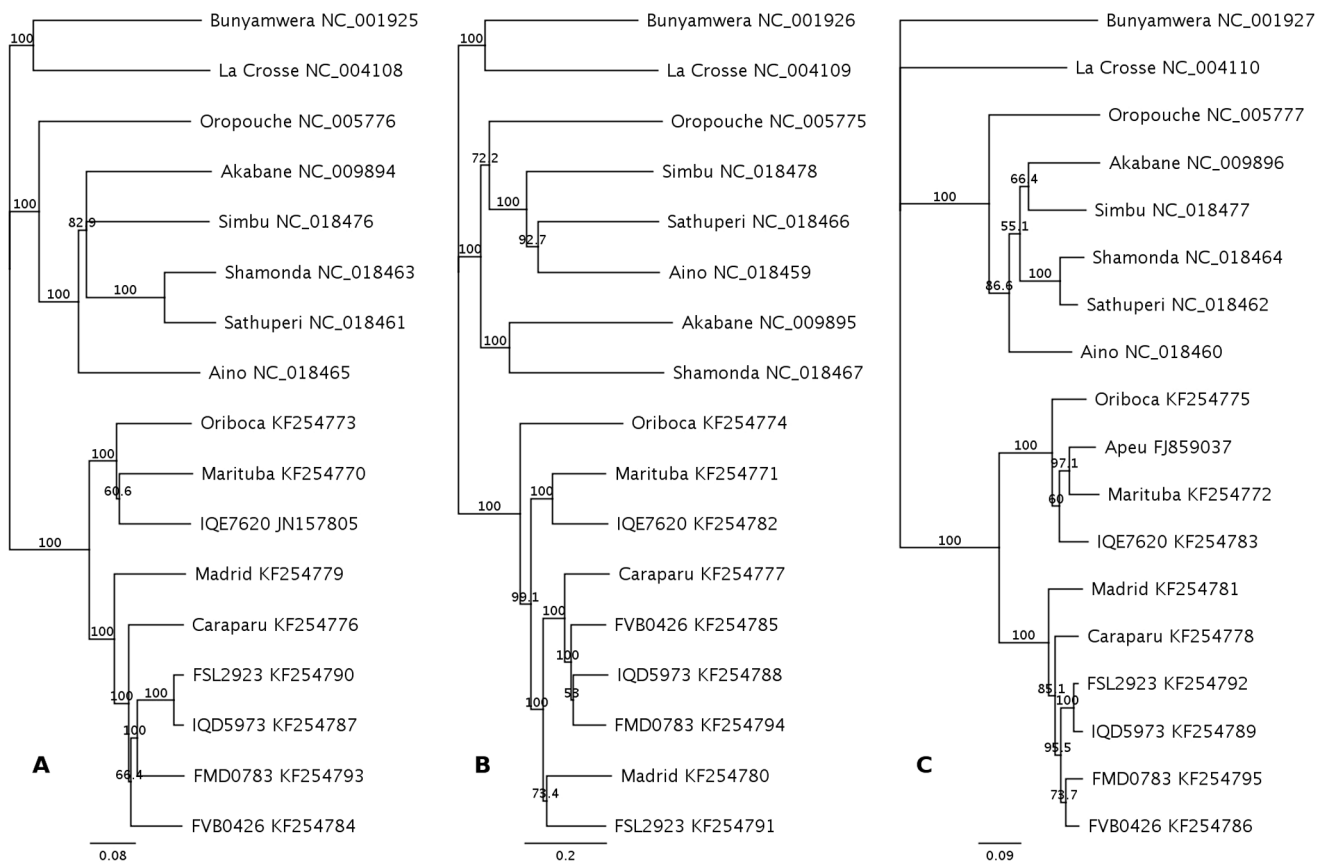

**Figure 1. Genome-wide phylogenetic analyses based on nucleotide sequences for orthobunyaviruses.** Complete coding sequences for nine group C viruses from this study and GenBank reference genome sequences (Refseq) for eight orthobunyaviruses were aligned with MUSCLE, trimmed to remove the unaligned termini, and used in construction of the phylogenetic trees by the Neighbor-Joining method and Tamura-Nei model for (A) L genome segment, (B) M genome segment and (C) S genome segment. Complete coding sequence for S segment of Apeu virus BeAn 848 was also included. The scale bars indicate nucleotide substitutions per site. Reliability of the branching patterns was assessed by bootstrap method with the use of 1000 replicates (shown at nodes). Virus names, strain identities and GenBank accession numbers are shown. doi:10.1371/journal.pone.0092114.g001

Gc) have variable level of conservation. Gn is highly conserved among group C viruses except for at the extreme N-terminus. NSm is very poorly conserved at the N- and C-termini, but highly conserved in between. The Gc gene products are poorly conserved in the N-terminal half of the protein, but more highly conserved in the C-terminal half (Figure 2), which is in line with the functional delineation study which suggested that N-terminal half of Gc is not essential for its structure and function in cell culture [31]. In addition, characteristic amino acid residues and motifs conserved across orthobunyaviruses were found to be well preserved in group C viruses. These include the potential N-linked glycosylation sites, trypsin cleavage sites, a number of cysteine residues, etc. [29,32,33]. M segment polyprotein of MTBV has 72 cysteines in total, 58 of which are strictly conserved among known orthobunyaviruses. All except 2 of the remaining 14 cysteines are conserved in all group C viruses.

## Discussion

Group C virus reference strains used in this genomic study were identified and established as references for each of the four major serological complexes of group C decades ago [6]. However, further categorization has been hampered by a paucity of genetic data for these reference strains. Our data provide a basis for comparing genetic and serological relationships among group C

viruses. The serological relationships among the references were defined by hemagglutination-inhibition (HI) and neutralization tests (NT), which are dependent on antigenic properties of the surface glycoproteins (Gn and Gc), and complement fixation (CF) tests, which are dependent on N protein antigenic characteristics [1,6]. MADV and CARV display some cross-reaction in both HI and CF assays. In contrast, MADV and CARV are very poorly cross-reactive with MTBV or ORIV in HI and CF tests [8]. MTBV weakly cross-reacted with both ORIV and CARV in HI and NT, but only cross-reacted with ORIV in CF [6]. We found these serological characterizations [34] consistent with the gene segment-specific phylogenetic relationships. For instance, ORIV and MTBV are on a same branch of the phylogenetic tree for S segment, which encodes N protein that attributes to CF antigenic activity but not for the M segment, which is associated with HI results.

The genome-wide phylogenetic analysis provides an important reference for primer design for diagnostics and additional molecular evolutionary analysis. The sequence alignment and conservation analysis revealed sequence and structural variations within the genome. This knowledge is informative for choosing a genome region(s) suitable for molecular assay development and phylogenetic analysis. These data are necessary for understanding the true extent of viral diversity and for understanding the epidemiology and epizootology of these viruses. In general, regions

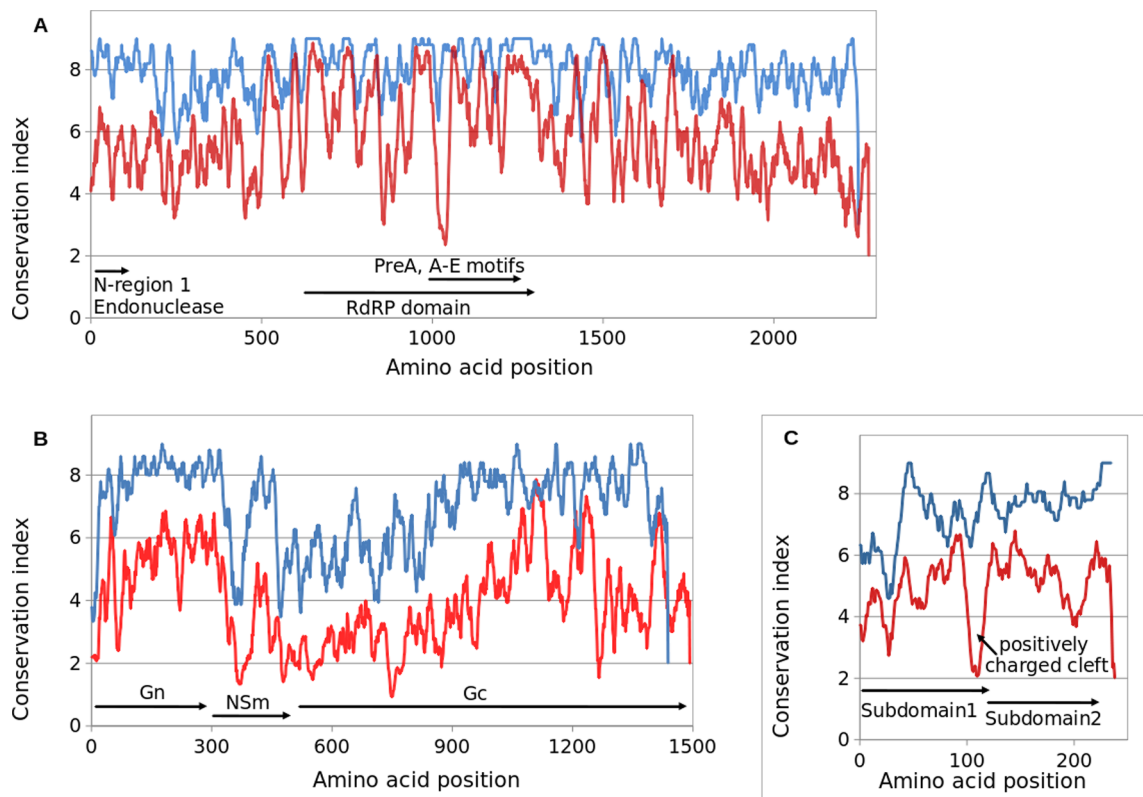

**Figure 2. Analyses of protein conservation for (A) L protein, (B) M polyprotein precursor and (C) N protein.** Protein sequences were aligned by the PROMALS server. The conservation index numbers (0–9 for the lowest to the highest) were averaged with a window size of 15 amino acids and then plotted to show amino acid conservation and variability. *Blue curves*, all nine group C viruses sequenced in this study. *Red curves*, the group C viruses and orthobunyaviruses of other serogroups (reference sequences in GenBank). Relative positions for Gn, NSm and Gc proteins on M segment and structural domains on L and S segment were indicated with the arrowed bars. doi:10.1371/journal.pone.0092114.g002

of the S and M segments are better suited than the most conserved L segment for discriminating diverse isolates unless the whole or a large portion of the L sequence is used. In particular, the 5'-terminal nucleotide sequence for glycoprotein Gc is highly variable, and is therefore well-suited for distinguishing closely related strains; while Gc sequences close to 3'- nucleotide terminus

are highly conserved within the serogroup and moderately variable among the different serogroups, thus adequate for comparing isolates with high divergence or isolates of different species.

Current rules for species demarcation for orthobunyaviruses are not clear. Orthobunyaviruses are widely present throughout the

**Table 3. Amino acid differences for the key functional residues of nucleoprotein (NP).**

| La Cross | MTBV          | ORIV          | MADV          | CARV          | Other group C viruses                                                                          | Other orthobunyaviruses                                           |
|----------|---------------|---------------|---------------|---------------|------------------------------------------------------------------------------------------------|-------------------------------------------------------------------|
| Pro84    | <b>Thr87</b>  | <b>Thr87</b>  | Pro87         | Pro87         | FMD0783/FVB0426 <b>Ser87</b> ; Apeu <b>Thr87</b>                                               | I612045 <b>Thr106</b> ; Oyo <b>Thr109</b> ; Wyeomyia <b>Asp84</b> |
| His93    | His96         | His96         | <b>Tyr96</b>  | <b>Tyr96</b>  | FSL2923/IQD5973/FMD0783 /FVB0426<br><b>Tyr 96</b>                                              | I612045 <b>Asn106</b> ; Oyo <b>Asn118</b>                         |
| Glu150   | Glu150        | Glu150        | <b>Ile150</b> | <b>Val150</b> | FSL2923/IQD5973/FMD0783 /FVB0426<br><b>Ile150</b>                                              |                                                                   |
| Thr155   | <b>Glu155</b> | <b>Glu155</b> | <b>Glu155</b> | <b>Glu155</b> | FSL2923/IQD5973/FMD0783 /FVB0426<br><b>Glu155</b> ; IEQ7620 <b>Asp155</b> ; Apeu <b>Glu155</b> | I612045 <b>Glu174</b> ; Oyo <b>Glu177</b> ; Leanyer <b>Asp156</b> |
| Pro160   | Pro160        | Pro160        | <b>Ser160</b> | <b>Ser160</b> | FSL2923/IQD5973/FMD0783 /FVB0426<br><b>Ser160</b>                                              |                                                                   |
| Ala191   | <b>Pro191</b> | <b>Pro191</b> | <b>Pro191</b> | <b>Pro191</b> | FSL2923/IQD5973/FMD0783 /FVB0426/<br>IEQ7620 <b>Pro191</b> ; Apeu <b>Pro191</b>                | Oyo <b>Pro214</b>                                                 |

Amino acid residues corresponding to the key residues for La Cross virus NP but with significant differences (shown in bold) were listed for the nine group C viruses and other orthobunyavirus species, which include NPs for Apeu (ACZ65466), I612045 virus (AED98378), Oyo (AEE01389), Leanyer (AEA02984) and Wyeomyia (AEZ35275). Other orthobunyavirus NPs that were compared but have no differences at these residue positions include Bunyamwera, Orpouche, Sathuperi, Shamonda, Akabane, Simbu, Aino, Guaroa (CAA51847), Manzanilla (AFI24665), and Schmallenberg (CCF55031) viruses. doi:10.1371/journal.pone.0092114.t003

world and enormously diverse, yet genetic and biochemical data is limited. Current guidelines from the ICTV for species definition are based on serological criteria (cross - neutralization and cross - hemagglutination inhibition tests), low likelihood of reassortment between species, and N protein amino acid divergence of more than 10% [1]. This pattern seems not supported by group C virus profiles found in this study. It does not apply well even to the reference strains which were proven antigenically distinct from each other – amino acid sequence identities for NP are 96.2% between ORIV and MTBV and 94.5% between CARV and MADV. This study suggests the need for future revision of the speciation criteria. Based on L segment sequence and comparison with existing data in GenBank, IQE7620 was provisionally named as Zungarococha virus (ZUNV) because of the low nucleotide and amino acid sequence identity with other reported orthobunyavirus sequences [15]. Further sequence analyses in this study suggests that ZUNV likely does not represent a novel species, but rather is a member of the MTBV serocomplex, because of its < 10% amino acid divergence in the N protein, as well as in the RdRP and M polyprotein. Our study showed M segment sequence can distinguish group C from other serogroups and effectively differentiate the four references from each other with >15% amino acid divergence; moreover, the phylogenetic dendrogram is in agreement with the antigenic relatedness defined primarily by the surface glycoproteins encoded by M segment. Therefore, we suggest M sequences are taken into account together with L and S sequences as criteria of sequence similarity for classification into species.

A further complication of species demarcation is the potential for reassortment. We observed that S segment based phylogeny was always consistent with L segment phylogeny. In contrast, M segment phylogeny was discrepant from L and S phylogenies for three (MADV, MTBV, FSL2923) out of nine group C isolates. This phenomenon appears to be applicable to other orthobunyaviruses that were presumably ascribed to M segment reassortant (Figure 1B) [29,33,35,36]. RdRP and NP are both components for the essential ribonucleoprotein complex, and functionally and structurally associated [37], which may restrict the viability of reassortants. M segment and the surface proteins are closely related to vector specificity, infectivity and escape from host immunity. Hypervariation of M sequences might allow for adaptation to a new vector or host. In this way, viruses from the same ancestor might become less alike in their M segments when exposed to distinctive immune selective pressures. As for the group C reference viruses, MADV/CARV and ORIV/MTBV might have respectively originated from two different ancestors and evolved into distinct species due to accumulated divergence on M sequence. Another example is the newly identified livestock pathogen Schmallenberg virus (SBV), which shares 98.7–99.1% (L), 89.7–90.2% (M) and 96.1–97.2% (S) amino acid identities to the Japanese Sathuperi viruses [35]. Moreover, in recent studies on sequence variability of SBV, M segment sequence was shown more variable than L and S, with a hypervariable region at the N-terminus of Gc protein [38,39]. *In vitro* successive SBV passage on baby hamster kidney cell line BHK-21 led to marked accumulation of mutations concentrated on the M segment hypervariable region [39]. Further investigation in vectors and hosts will provide more definitive insights on the molecular and antigenic evolution of the orthobunyaviruses.

Group C virus sequences from this study are in good agreement with data from other studies, including nine sequences in GenBank [13,23], with a remarkable exception for the 39 sequences (DQ188946 – DQ188984) by Nunes et al (see below) [14]. CARV BeAn3994 sequence determined here is nearly identical (99.78%)

to the 5555 nucleotides 5'-terminal L segment sequence for CARV BeAn3994 (EF122411, nucleotide identity 5532/5544, RdRP amino acid identity 1829/1833) [23]. Similarly, a 299 nucleotide / 99 amino acid M segment fragment (AF499012) from Vines virus, a member of the CARV serocomplex, is >95% identical at the amino acid level to CARV. Partial L (FL859039), partial M (FL859038) and complete S segment (FL859037) sequences from a clone of Apeu virus (APEUV, a member of the CARV serocomplex) strain BeAn848 [13] have amino acid identity of 73.9%, 92.9%, and 72.2%, respectively, with CARV; and 92.8%, 81.4%, and 97.9%, respectively, with MTBV (S segment phylogeny shown in Figure 1C). This sequence divergence pattern explains serological test results, in which CARV cross-reacted strongly with APEUV in HI tests but poorly in CF test, while APEUV BeAn848 cross-reacted strongly with MTBV in CF test [6,34]. The results also suggest the evolutionary association of L and S segments, as described above, and the possibility that BeAn848 is a reassortant of MTBV and M segment of CARV.

The sequences by Nunes et al [14] were divergent from sequences derived in this and other studies, despite ostensibly originating from the same strains of group C viruses. For example, CARV strain BeAn3994 from our study shared only 35.0% S segment amino acid identity with the same CARV strain from the Nunes et al study. Similarly, de Brito Magalhes et al found that the S segment sequence of APEUV BeAn848 (FJ859037) has amino acid identity of only 35.0% and 33.3%, respectively, to sequences reported by Nunes et al for APEUV (strain BeAn848; DQ188952) and CARV (DQ188948), which were even lower than the identity (41.5%) with Bunyamwera (AF325122) [13]. As described in Forshey et al. (2014) [40], we were unable to amplify viral RNA using the primers published by Nunes et al, despite repeated attempts. Others have reported a similar inability to amplify group C orthobunyavirus RNA with the published primers (Lambert et al) [41]. Using our unbiased *de novo* sequencing approach, we generated full coding region sequences and could not identify clear complimentary sites for binding of the published primers. For these reasons, we have chosen to exclude the data from the Nunes et al study [14] from our analyses.

To date, group C viruses have not been associated with large scale outbreaks in humans, and the natural maintenance cycle is poorly understood. In Trinidad, all 16 group C virus isolates were collected from *Culex (Melanoconion)* spp. [42]. In an arbovirus surveillance study among mosquitoes in the Amazon Basin region of Peru, 164 viruses were isolated, among them 69 were orthobunyaviruses, 42 of which were group C viruses, predominantly carried by mosquitoes belonging to *Culex (Melanoconion)* spp. [10]. The frequent identification of group C viruses from mosquitoes in the area is consistent with our observation from a clinic-based febrile illness surveillance program, which demonstrated that orthobunyaviruses accounted for approximately 2.5% of all febrile cases, and 30 out of 54 orthobunyavirus isolates belonged to group C [11]. Infection by group C viruses causes a mild to severe illness. Since current surveillance studies are mainly focused on cases with clinical significance, the prevalence of the viral infections is likely underestimated and warrants further exploration. The sequence data presented here will facilitate surveillance investigations and ultimately a more comprehensive understanding of the genetic diversity, evolution mechanism, ecological niches and epidemic potential of the group C viruses.

Without thorough study of group C viruses, we cannot rule out the possibility that it may cause severe disease in humans or animals as Oropouche and Schmallenberg viruses have done [43,44]. Group C viruses continue to circulate and cause diseases

in humans throughout the Americas, indicating the need for continued surveillance and in-depth research on this group of diverse viruses. Future studies will focus on genomic and serological analysis of a broader panel of isolates from South America using primers designed based on the sequences reported here. Comparative genomic study of these related viruses, together with other orthobunyaviruses, will help clarify taxonomic relationships and delineate antigenic sites responsible for host specificity and adaptation. Additionally, sequences for terminal untranslated regions (UTRs) will also be pursued by using method such as 5'/3' rapid amplification of cDNA ends (RACE) sequencing [21], not only to accomplish complete genome sequences, but also to investigate the specific roles of the conserved and variable UTR sequences in the virus structure and regulation of biological processes. Joining molecular and genomic approaches with serological tests, and including clinical samples from a broader geographic and temporal spectrum, will help us better understand the distribution of these viruses and the potential for broader emergence.

## Supporting Information

**Table S1 Percent sequence identities between orthobunyaviruses.** Complete coding sequences for nine group C viruses (this study) and eight orthobunyaviruses reference sequences (RefSeq of GenBank) were aligned with MUSCLE, trimmed to remove non-aligned terminal sequences and calculated for sequence identity percentages. Both nucleotide sequences (L, M

and S segments) and correspondent protein sequences (L protein, M polyprotein and N protein) were analyzed with the results shown in the *upper-right* and *lower-left* of the tables, respectively. *Shaded* areas, results for comparison between viruses of same serogroup, i.e., Simbu group or group C viruses. Names of group C reference viruses are shown in bold.

(DOCX)

## Acknowledgments

We would like to thank Ms. Jitvimol Seriwatana, Drs. Yanfei Zhou, Jason T. Ladner, Leonard N. Binn, Gustavo Palacios, and Stephen J. Thomas for technical support and critical reading of the manuscript.

Disclaimers: The opinions expressed in this work are those of the authors and do not reflect the official policy or position of the Department of the Army, the Department of the Navy, DoD, or U.S. government.

Copyright statement: Some of the authors are military service members or employees of the U.S. Government. This work was prepared as part of their official duties. Title 17 U.S.C. §105 provides that 'Copyright protection under this title is not available for any work of the United States Government.' Title 17 U.S.C. §101 defines a U.S. Government work as a work prepared by a military service member or employee of the U.S. Government as part of that person's official duties.

## Author Contributions

Conceived and designed the experiments: JH BMF RAK ESH RGJ TJK. Performed the experiments: JH BMF YY. Analyzed the data: JH BMF. Contributed reagents/materials/analysis tools: BMF VFS RAK ESH RGJ TJK. Wrote the paper: JH BMF.

## References

- Plyusnin A, Beaty BJ, Elliott RM, Goldbach R, Kormelink R, et al. (2012) Bunyaviridae. In: King AMQ, Adams MJ, Carstens EB, Lefkowitz EJ, editors. *Virus taxonomy: ninth report of the International Committee on Taxonomy of Viruses*. London: Elsevier Academic Press. pp. 725–741.
- Walter CT, Barr JN (2011) Recent advances in the molecular and cellular biology of bunyaviruses. *J Gen Virol* 92: 2467–2484.
- Eifan S, Schnettler E, Dietrich I, Kohl A, Blomstrom AL (2013) Non-structural proteins of arthropod-borne bunyaviruses: roles and functions. *Viruses* 5: 2447–2468.
- Vasconcelos HB, Nunes MR, Casseb LM, Carvalho VL, Pinto da Silva EV, et al. (2011) Molecular epidemiology of Oropouche virus, Brazil. *Emerg Infect Dis* 17: 800–806.
- Gerrard SR, Li L, Barrett AD, Nichol ST (2004) Ngari virus is a Bunyamwera virus reassortant that can be associated with large outbreaks of hemorrhagic fever in Africa. *J Virol* 78: 8922–8926.
- Casals J, Whitman L (1961) Group C, a new serological group of hitherto undescribed arthropod-borne viruses. *Immunological studies*. *Am J Trop Med Hyg* 10: 250–258.
- Srihongse S, Galindo P, Grayson MA (1966) Isolation of group C arboviruses in Panama including two new members, Patois and Zegla. *Am J Trop Med Hyg* 15: 379–384.
- Derodaniche E, Paesdeandrade A, Galindo P (1964) Isolation of Two Antigenically Distinct Arthropod-Borne Viruses of Group C in Panama. *Am J Trop Med Hyg* 13: 839–843.
- Mores CN, Turell MJ, Dyer J, Rossi CA (2009) Phylogenetic relationships among orthobunyaviruses isolated from mosquitoes captured in Peru. *Vector Borne Zoonotic Dis* 9: 25–32.
- Turell MJ, O'Guinn ML, Jones JW, Sardelis MR, Dohm DJ, et al. (2005) Isolation of viruses from mosquitoes (Diptera: Culicidae) collected in the Amazon Basin region of Peru. *J Med Entomol* 42: 891–898.
- Forshey BM, Guevara C, Laguna-Torres VA, Cespedes M, Vargas J, et al. (2010) Arboviral etiologies of acute febrile illnesses in Western South America, 2000–2007. *PLoS Negl Trop Dis* 4: e787.
- Pinheiro FP, da Rosa APA (1994) Part F. Group C bunyaviral fevers. In: Beran GM, editor. *Handbook of zoonoses*. Boca Raton: CRC Press, Inc. pp. 212–214.
- de Brito Magalhaes CL, Drummond BP, Novaes RF, Quinan BR, de Magalhaes JC, et al. (2011) Identification of a phylogenetically distinct orthobunyavirus from group C. *Arch Virol* 156: 1173–1184.
- Nunes MR, Travassos da Rosa AP, Weaver SC, Tesh RB, Vasconcelos PF (2005) Molecular epidemiology of group C viruses (Bunyaviridae, Orthobunyavirus) isolated in the Americas. *J Virol* 79: 10561–10570.
- Hang J, Forshey BM, Kochel TJ, Li T, Solorzano VF, et al. (2012) Random amplification and pyrosequencing for identification of novel viral genome sequences. *J Biomol Tech* 23: 4–10.
- Tamura K, Peterson D, Peterson N, Stecher G, Nei M, et al. (2011) MEGA5: molecular evolutionary genetics analysis using maximum likelihood, evolutionary distance, and maximum parsimony methods. *Mol Biol Evol* 28: 2731–2739.
- Johnson M, Zaretskaya I, Raytselis Y, Merezhuk Y, McGinnis S, et al. (2008) NCBI BLAST: a better web interface. *Nucleic Acids Res* 36: W5–9.
- Edgar RC (2004) MUSCLE: multiple sequence alignment with high accuracy and high throughput. *Nucleic Acids Res* 32: 1792–1797.
- Pei J, Kim BH, Tang M, Grishin NV (2007) PROMALS web server for accurate multiple protein sequence alignments. *Nucleic Acids Res* 35: W649–652.
- Pei J, Grishin NV (2007) PROMALS: towards accurate multiple sequence alignments of distantly related proteins. *Bioinformatics* 23: 802–808.
- Lanciotti RS, Kosoy OI, Bosco-Lauth AM, Pohl J, Stuchlik O, et al. (2013) Isolation of a novel orthobunyavirus (Brazoran virus) with a 1.7 kb S segment that encodes a unique nucleocapsid protein possessing two putative functional domains. *Virology* 444: 55–63.
- Muller R, Poch O, Delarue M, Bishop DH, Bouloy M (1994) Rift Valley fever virus L segment: correction of the sequence and possible functional role of newly identified regions conserved in RNA-dependent polymerases. *J Gen Virol* 75 (Pt 6): 1345–1352.
- de Brito Magalhaes CL, Quinan BR, Novaes RF, dos Santos JR, Kroon EG, et al. (2007) Caraparu virus (group C Orthobunyavirus): sequencing and phylogenetic analysis based on the conserved region 3 of the RNA polymerase gene. *Virus Genes* 35: 681–684.
- Reguera J, Weber F, Cusack S (2010) Bunyaviridae RNA polymerases (L-protein) have an N-terminal, influenza-like endonuclease domain, essential for viral cap-dependent transcription. *PLoS Pathog* 6: e1001101.
- Reguera J, Malet H, Weber F, Cusack S (2013) Structural basis for encapsidation of genomic RNA by La Crosse Orthobunyavirus nucleoprotein. *Proc Natl Acad Sci U S A* 110: 7246–7251.
- Ariza A, Tanner SJ, Walter CT, Dent KC, Shepherd DA, et al. (2013) Nucleocapsid protein structures from orthobunyaviruses reveal insight into ribonucleoprotein architecture and RNA polymerization. *Nucleic Acids Res* 41: 5912–5926.
- Eifan SA, Elliott RM (2009) Mutational analysis of the Bunyamwera orthobunyavirus nucleocapsid protein gene. *J Virol* 83: 11307–11317.
- Firth AE, Brierley I (2012) Non-canonical translation in RNA viruses. *J Gen Virol* 93: 1385–1409.
- Chowdhary R, Street C, Travassos da Rosa A, Nunes MR, Tee KK, et al. (2012) Genetic characterization of the Wyeomyia group of orthobunyaviruses and their phylogenetic relationships. *J Gen Virol* 93: 1023–1034.
- Mohamed M, McLees A, Elliott RM (2009) Viruses in the Anopheles A, Anopheles B, and Tete serogroups in the Orthobunyavirus genus (family Bunyaviridae) do not encode an NSs protein. *J Virol* 83: 7612–7618.



31. Shi X, Goli J, Clark G, Brauburger K, Elliott RM (2009) Functional analysis of the Bunyamwera orthobunyavirus Gc glycoprotein. *J Gen Virol* 90: 2483–2492.
32. Elliott RM (1990) Molecular biology of the Bunyaviridae. *J Gen Virol* 71 (Pt 3): 501–522.
33. Briese T, Kapoor V, Lipkin WI (2007) Natural M-segment reassortment in Potosi and Main Drain viruses: implications for the evolution of orthobunyaviruses. *Arch Virol* 152: 2237–2247.
34. Shope RE, Causey OR (1962) Further studies on the serological relationships of group C arthropod-borne viruses and the application of these relationships to rapid identification of types. *Am J Trop Med Hyg* 11: 283–290.
35. Yanase T, Kato T, Aizawa M, Shuto Y, Shirafuji H, et al. (2012) Genetic reassortment between Sathuperi and Shamonda viruses of the genus Orthobunyavirus in nature: implications for their genetic relationship to Schmallenberg virus. *Arch Virol* 157: 1611–1616.
36. Briese T, Calisher CH, Higgs S (2013) Viruses of the family Bunyaviridae: are all available isolates reassortants? *Virology* 446: 207–216.
37. Morin B, Kranzusch PJ, Rahme AA, Whelan SP (2013) The polymerase of negative-stranded RNA viruses. *Curr Opin Virol* 3: 103–110.
38. Fischer M, Hoffmann B, Goller KV, Hoper D, Wernike K, et al. (2013) A mutation ‘hot spot’ in the Schmallenberg virus M segment. *J Gen Virol* 94: 1161–1167.
39. Coupeau D, Claine F, Wiggers L, Kirschvink N, Muylkens B (2013) In vivo and in vitro identification of a hypervariable region in Schmallenberg virus. *J Gen Virol* 94: 1168–1174.
40. Forshey BM, Castillo RM, Hang J (2014) Group C orthobunyavirus genomic sequences require validation. *J Virol* 88: 3052–3053.
41. Lambert AJ, Lanciotti RS (2009) Consensus amplification and novel multiplex sequencing method for S segment species identification of 47 viruses of the Orthobunyavirus, Phlebovirus, and Nairovirus genera of the family Bunyaviridae. *J Clin Microbiol* 47: 2398–2404.
42. Aguilar PV, Morrison AC, Rocha C, Watts DM, Beingolea L, et al. (2010) Guaroa virus infection among humans in Bolivia and Peru. *Am J Trop Med Hyg* 83: 714–721.
43. Bastos Mde S, Figueiredo LT, Naveca FG, Monte RL, Lessa N, et al. (2012) Identification of Oropouche Orthobunyavirus in the cerebrospinal fluid of three patients in the Amazonas, Brazil. *Am J Trop Med Hyg* 86: 732–735.
44. Beer M, Conraths FJ, van der Poel WH (2013) ‘Schmallenberg virus’—a novel orthobunyavirus emerging in Europe. *Epidemiol Infect* 141: 1–8.
